# Supplementary material
Source: PubMed Central journal article supplement (PMC2747193)
Supplement: 0906894106_0906894106SI.pdf [file 0906894106_0906894106SI.pdf]

# Supporting Information

Maehr et al. 10.1073/pnas.0906894106

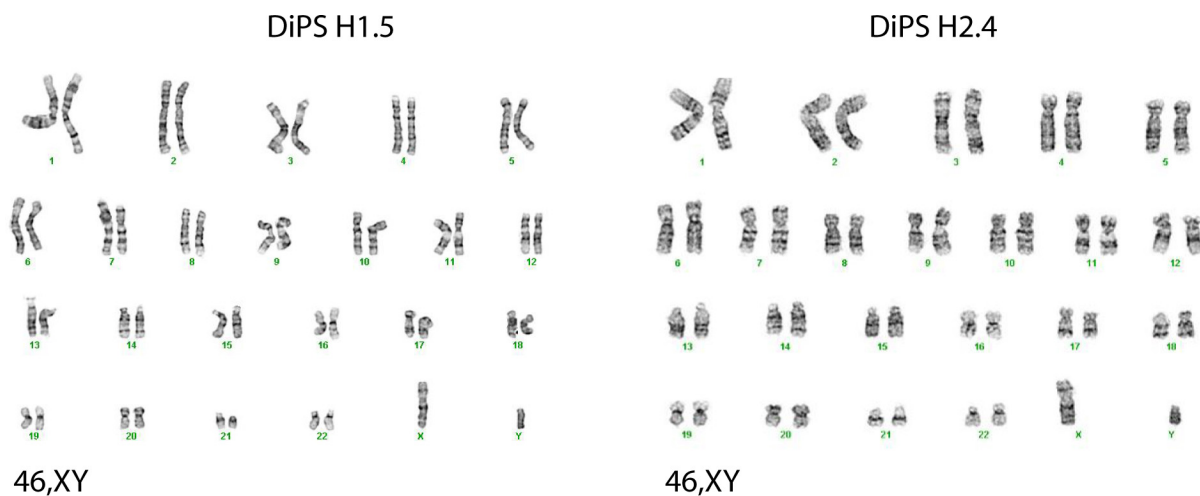

**Fig. S1.** Representative karyotype analysis of type 1 diabetes-specific induced pluripotent stem (DiPS) cells lines from Patient H1 and H2. Karyotype analysis was conducted on DiPS cells (passages 8–11) at UMass Memorial Medical Center (Worcester, MA).

**Table S1. DNA fingerprint of parental fibroblast lines and DiPS lines**

|            | Fibroblasts |     |            |      | DiPS       |     |            |      |
|------------|-------------|-----|------------|------|------------|-----|------------|------|
|            | Patient H1  |     | Patient H2 |      | Patient H1 |     | Patient H2 |      |
| Amelogenin | X           | Y   | X          | Y    | X          | Y   | X          | Y    |
| vWA        | 17          | —   | 16         | 18   | 17         | —   | 16         | 18   |
| D8S1179    | 12          | 15  | 14         | 15   | 12         | 15  | 14         | 15   |
| TPOX       | 11          | —   | 8          | 9    | 11         | —   | 8          | 9    |
| FGA        | 24          | —   | 18         | 23   | 24         | —   | 18         | 23   |
| D3S1358    | 15          | 18  | 16         | —    | 15         | 18  | 16         | —    |
| THO1       | 9           | 9.3 | 9.3        | —    | 9          | 9.3 | 9.3        | —    |
| D21S11     | 27          | 29  | 30         | 32.2 | 27         | 29  | 30         | 32.2 |
| D18S51     | 14          | 16  | 14         | 18   | 14         | 16  | 14         | 18   |
| Penta E    | 5           | —   | 14         | 16   | 5          | —   | 14         | 16   |
| D5S818     | 11          | 13  | 9          | 12   | 11         | 13  | 9          | 12   |
| D13S317    | 11          | 13  | 11         | 13   | 11         | 13  | 11         | 13   |
| D7S820     | 10          | 12  | 8          | 10   | 10         | 12  | 8          | 10   |
| D16S539    | 11          | 12  | 9          | 11   | 11         | 12  | 9          | 11   |
| CSF1PO     | 11          | 13  | 11         | 12   | 11         | 13  | 11         | 12   |
| Penta D    | 10          | —   | 12         | —    | 10         | —   | 12         | —    |

Shown here are representative DNA fingerprint results for parental fibroblast and DiPS lines. Analyzed were Amelogenin for sex chromosomes in addition to 15 polymorphic short tandem repeat DNA loci. Analysis was performed by Cell Line Genetics.

**Table S2. Coefficient of determination ( $r^2$  = square of the correlation efficient) values between parental fibroblasts, DiPS, and human ES cells**

|               | Fibroblast H1 | Fibroblast H2 | HUES 4      | HUES 6      | HUES 8      | DiPS H1.5   | DiPS H2.1   | DiPS H2.B3  | DiPS H2.4 |
|---------------|---------------|---------------|-------------|-------------|-------------|-------------|-------------|-------------|-----------|
| Fibroblast H1 | X             | —             | —           | —           | —           | —           | —           | —           | —         |
| Fibroblast H2 | <b>0.98</b>   | X             | —           | —           | —           | —           | —           | —           | —         |
| HUES 4        | <b>0.75</b>   | <b>0.75</b>   | X           | —           | —           | —           | —           | —           | —         |
| HUES 6        | <b>0.72</b>   | <b>0.73</b>   | <b>0.96</b> | X           | —           | —           | —           | —           | —         |
| HUES 8        | <b>0.73</b>   | <b>0.73</b>   | <b>0.98</b> | <b>0.97</b> | X           | —           | —           | —           | —         |
| DiPS H1.5     | <b>0.73</b>   | <b>0.74</b>   | <b>0.97</b> | <b>0.94</b> | <b>0.97</b> | X           | —           | —           | —         |
| DiPS H2.1     | <b>0.73</b>   | <b>0.74</b>   | <b>0.97</b> | <b>0.96</b> | <b>0.97</b> | <b>0.98</b> | X           | —           | —         |
| DiPS H2.3     | <b>0.71</b>   | <b>0.72</b>   | <b>0.97</b> | <b>0.95</b> | <b>0.97</b> | <b>0.97</b> | <b>0.98</b> | X           | —         |
| DiPS H2.4     | <b>0.73</b>   | <b>0.74</b>   | <b>0.97</b> | <b>0.96</b> | <b>0.98</b> | <b>0.99</b> | <b>0.98</b> | <b>0.97</b> | X         |

The  $r^2$  values between DiPS lines and parental fibroblasts are displayed in bold. The  $r^2$  values between DiPS lines and human ES cell lines are displayed in italics.
